# Supplementary material for: Fusion of Smartphone Motion Sensors for Physical Activity Recognition
Source: MDPI journal article supplement (doi:10.3390/s140610146), 2014-06-10
Supplement: s1 [file s1]

*Supplementary Information***Fusion of Smartphone Motion Sensors for Physical Activity Recognition. *Sensors* 2014, 14(6), 10146-10176**

**Muhammad Shoaib <sup>1,\*</sup>, Stephan Bosch <sup>1</sup>, Ozlem Durmaz Incel <sup>2</sup>, Hans Scholten <sup>1</sup>  
and Paul J. M. Havinga <sup>1</sup>**

<sup>1</sup> Pervasive Systems Group, Department of Computer Science, Zilverling Building,  
PO-Box 217,7500 AE Enschede, The Netherlands; E-Mail: Stephan.bosch@utwente.nl (S.B.);  
hans.scholten@utwente.nl (H.S.); p.j.m.havinga@utwente.nl (P.J.M.H).

<sup>2</sup> Department of Computer Engineering, Galatasaray University, Ortakoy, Istanbul 34349, Turkey;  
E-Mails: odurmaz@gmail.com

\* Author to whom correspondence should be addressed; E-Mail: m.shoaib@utwente.nl;  
Tel.: +31-53-489-3028; Fax: +31-53-489-4590.

*Received: 2 April 2014; in revised form: 13 May 2014 / Accepted: 4 June 2014 /*

*Published: 10 June 2014*

---

This file explains a correction regarding the number and type of activities in our dataset for this paper.

We have used two different names, such as “running” and “jogging”, for the same activity by mistake. This has led to confusion that there are eight activities in our dataset, whereas we collected data only for seven activities. We only considered “jogging” activity, which can be considered slow running. However, using these two terms has created confusion for the users. Therefore, every running activity should be considered as jogging activity in this paper. It has been mentioned only twice in Section 3. In the first paragraph of section 3 at page number 10150 (which is a duplicate term and should be discarded), and at line 6, where it is used instead of “jogging” and should be read as “jogging”. To summarize, there are only seven activities, which are walking, sitting, standing, jogging, biking, walking upstairs, and walking downstairs.

**Original Text: Section 3: Data Collection (Page number: 10150)**

In the data collection experiments, we collected data for seven physical activities. These are walking, **running**, sitting, standing, **jogging**, biking, walking upstairs, and walking downstairs, which are mainly used in the related studies, and they are the basic motion activities in daily life. There were ten participants involved in our data collection experiment, who performed each of these activities for 3–4 min. All ten participants were male, between the ages of 25 and 30. The experiments were carried out

indoors in one of the university buildings, except biking. For walking and **running**, the department corridor was used. For walking upstairs and downstairs, a 5-floor building with stairs was used.

**Revised Text: Section 3: Data Collection (Page number: 10150)**

In the data collection experiments, we collected data for seven physical activities. These are walking, sitting, standing, jogging, biking, walking upstairs, and walking downstairs, which are mainly used in the related studies, and they are the basic motion activities in daily life. There were ten participants involved in our data collection experiment, who performed each of these activities for 3–4 min. All ten participants were male, between the ages of 25 and 30. The experiments were carried out indoors in one of the university buildings, except biking. For walking and **jogging**, the department corridor was used. For walking upstairs and downstairs, a 5-floor building with stairs was used.

© 2014 by the authors; licensee MDPI, Basel, Switzerland. This article is an open access article distributed under the terms and conditions of the Creative Commons Attribution license (<http://creativecommons.org/licenses/by/4.0/>).
